# Supplementary material for: Universal Count Correction for High-Throughput Sequencing
Source: PLOS journal article supplement (doi:10.1371/journal.pcbi.1003494), 2014-03-06
Supplement: S3 (10.1371/journal.pcbi.1003494.s003) [file journal.pcbi.1003494.s003]

**Table S1. Comparison to a specialized ChIP-seq event caller**

| Method      | Raw   | Deduplication | FIXSEQ | GEM   |
|-------------|-------|---------------|--------|-------|
| correlation | 0.672 | 0.675         | 0.677  | 0.697 |

Correlation in q-value across replicates is shown for a set of hESC CTCF ChIP-seq experiments, with varying count preprocessing schemes.
